# Supplementary material for: Oyster Shell Proteins Originate from Multiple Organs and Their Probable Transport Pathway to the Shell Formation Front
Source: PubMed Central journal article supplement (PMC3686672; doi:10.1371/journal.pone.0066522), 2013-06-19

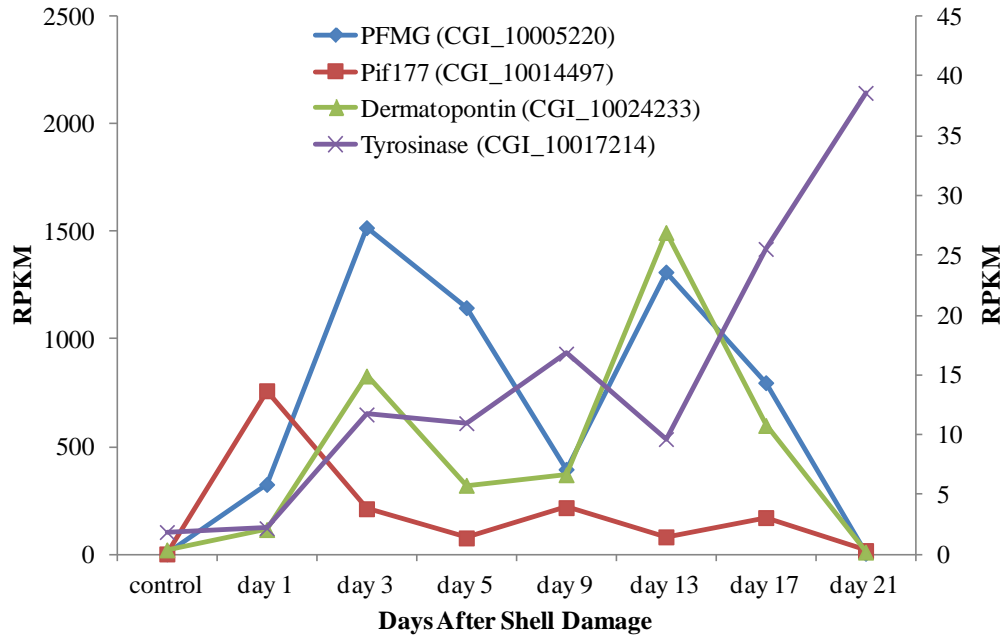

Supplement: pone.0066522.s001.pdf [file pone.0066522.s001.pdf]
